# Supplementary material for: Interleukin-1β Induced Matrix Metalloproteinase Expression in Human Periodontal Ligament-Derived Mesenchymal Stromal Cells under In Vitro Simulated Static Orthodontic Forces
Source: MDPI journal article supplement (doi:10.3390/ijms22031027), 2021-01-20
Supplement: s1 [file s1]

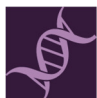

## Supplementary Material

Article

### Interleukin-1 $\beta$ induced matrix metalloproteinase expression in human periodontal ligament-derived mesenchymal stromal cells under in vitro simulated static orthodontic forces

Christian Behm, Michael Nemec, Alice Blufstein, Maria Schubert, Xiaohui Rausch-Fan, Oleh Andrukhov and Erwin Jonke

Supplementary Table S1

|       | MSC marker<br>(%) | Hematopoietic Marker<br>(%) |
|-------|-------------------|-----------------------------|
| CD29  | 97.66 $\pm$ 0.19  | -                           |
| CD73  | 96.29 $\pm$ 0.22  | -                           |
| CD90  | 97.85 $\pm$ 0.31  | -                           |
| CD105 | 96.96 $\pm$ 0.42  | -                           |
| CD146 | 62.63 $\pm$ 4.74  | -                           |
| CD31  | -                 | 0.46 $\pm$ 0.02             |
| CD34  | -                 | 0.50 $\pm$ 0.15             |
| CD45  | -                 | 2.49 $\pm$ 0.26             |

**Supplementary Table S1.** Flow cytometry analysis of MSCs' and hematopoietic surface marker expression in hPDL-MSCs. The table shows the percentage of positive hPDL-MSCs for each surface marker. The data are presented as mean  $\pm$  standard error of the mean.

**Publisher's Note:** MDPI stays neutral with regard to jurisdictional claims in published maps and institutional affiliations.

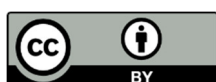

© 2021 by the author. Licensee MDPI, Basel, Switzerland. This article is an open access article distributed under the terms and conditions of the Creative Commons Attribution (CC BY) license (<http://creativecommons.org/licenses/by/4.0/>).
